# Supplementary material for: CCL5-CCR5 interactions modulate metabolic events during tumor onset to promote tumorigenesis
Source: PubMed Central journal article supplement (PMC5721608; doi:10.1186/s12885-017-3817-0), 2017-12-08

Figure S1

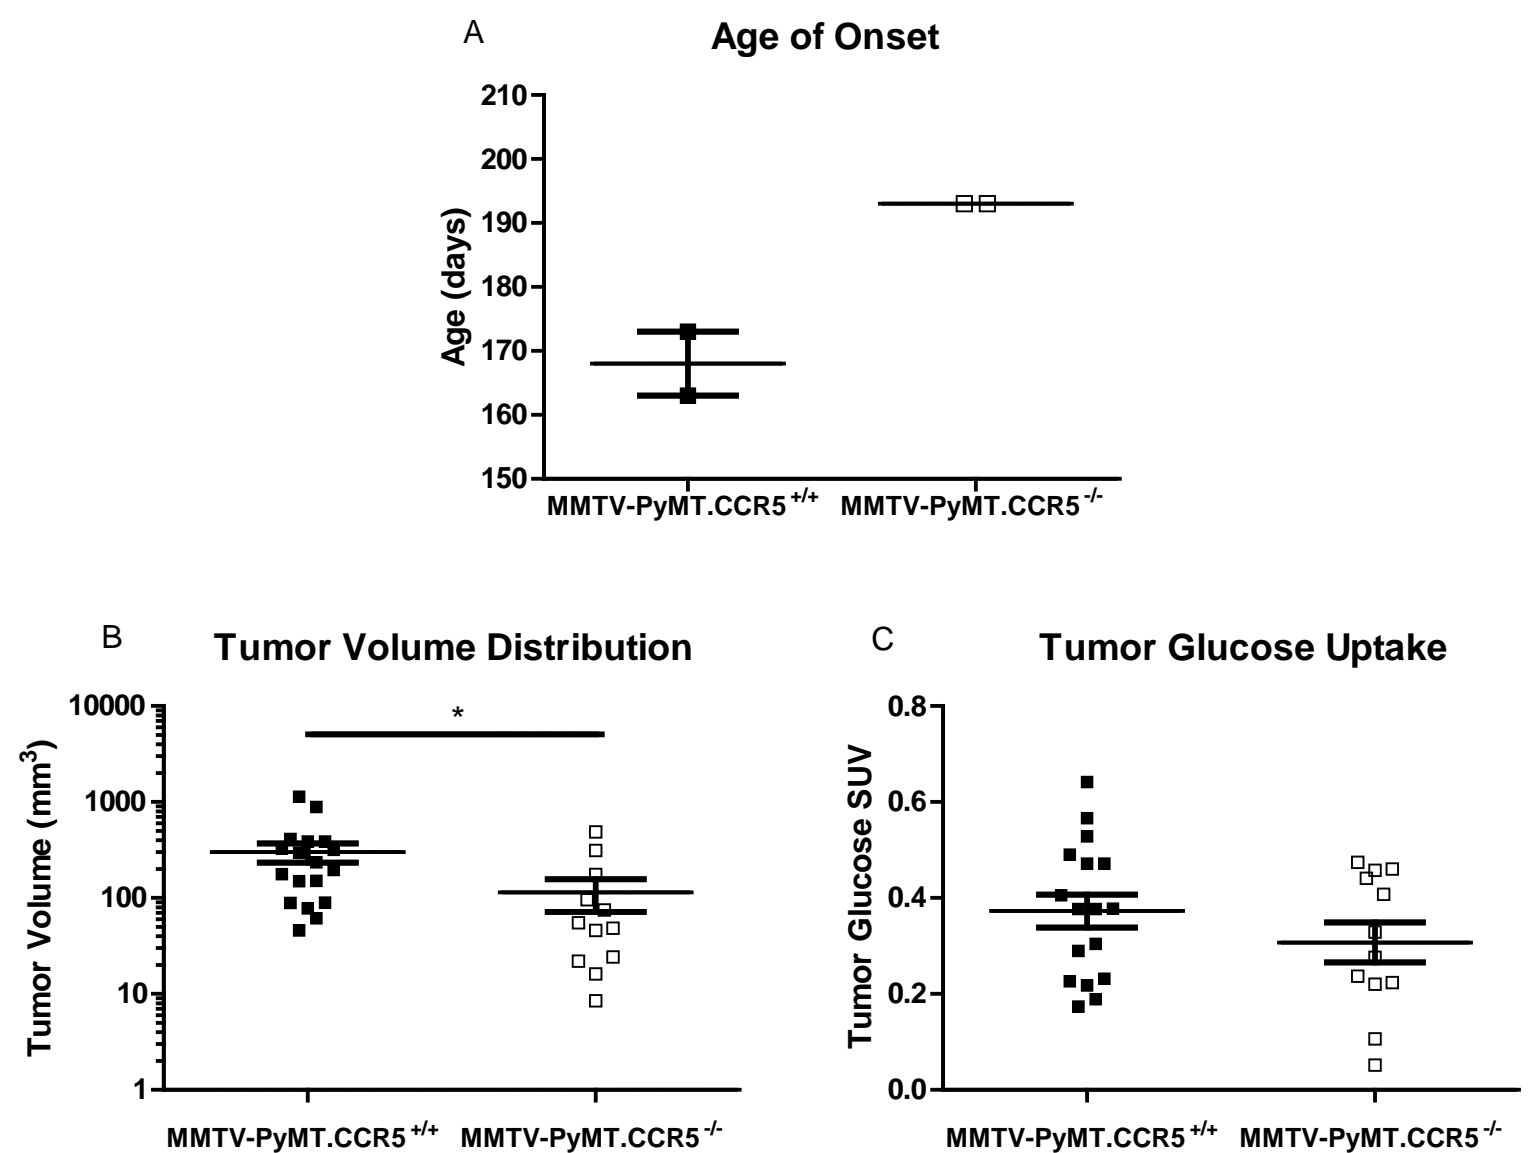

Supplement: 12885_2017_3817_MOESM1_ESM.pdf [file 12885_2017_3817_MOESM1_ESM.pdf]
