# Supplementary material for: CCL5-CCR5 interactions modulate metabolic events during tumor onset to promote tumorigenesis
Source: Springer Nature journal article supplement (doi:10.1186/s12885-017-3817-0), 2017-12-01

Figure S4

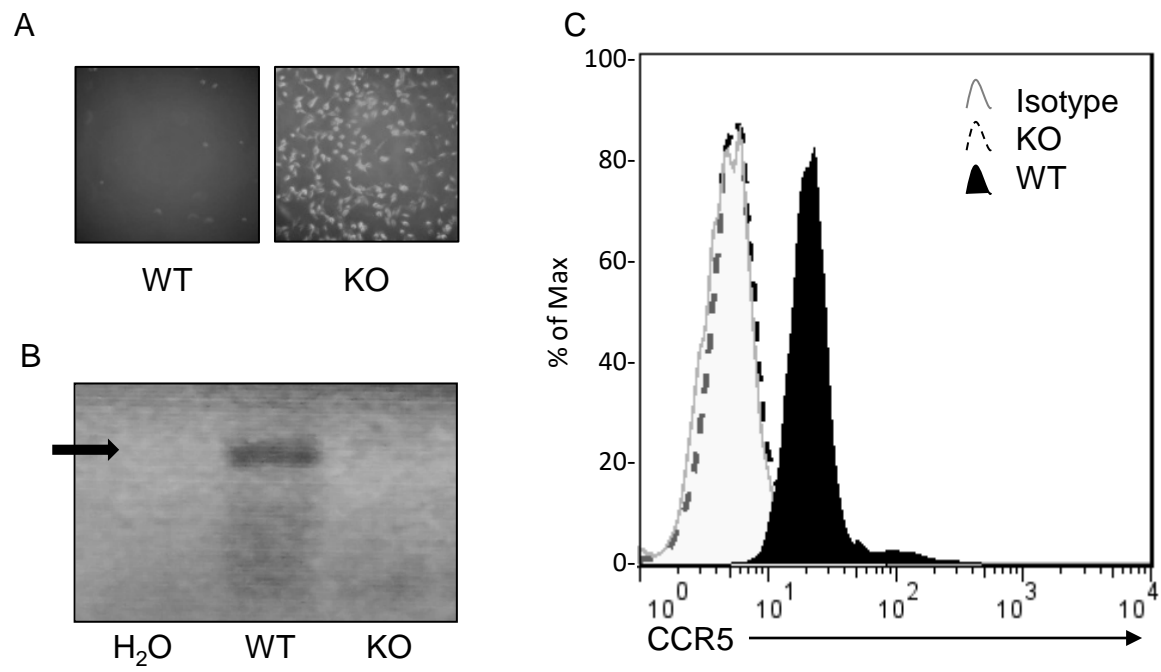

Supplement: MOESM4 [file 15290570]
